# Supplementary material for: Selenium chalcogen bonds are involved in protein–carbohydrate recognition: a combined PDB and theoretical study
Source: Royal Society of Chemistry journal article supplement (doi:10.1039/d1cp01929e), 2021-01-01
Supplement: d1cp01929e1.pdf [file d1cp01929e1.pdf]

# Selenium Chalcogen bonds are involved in protein-carbohydrate recognition: A combined PDB and theoretical study.

Jose A. Fernández Riveras,<sup>a</sup> Antonio Frontera<sup>a</sup> and Antonio Bauzá<sup>a,\*</sup>

<sup>a</sup>Department of Chemistry, Universitat de les Illes Balears  
Ctra. de Valldemossa km 7.5, 07122 Palma de Mallorca (Spain)  
E-mail: [antonio.bauza@uib.es](mailto:antonio.bauza@uib.es)

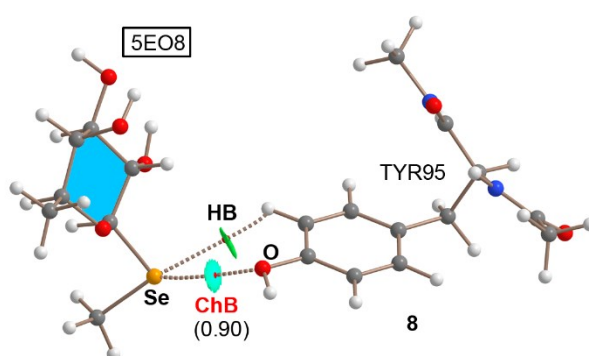

**FigS1.** Distribution of critical points and bond paths in complex **8**. Intermolecular bond critical points (BCPs) are denoted by red dots. The bond paths connecting bond critical points are also represented. The value of the density at the BCP ( $\rho \cdot 10^2$ , a.u.) is also indicated for the ChB interaction (highlighted in red). NCIplot surfaces involving only intermolecular contacts between the Se-pyranose ligand and TYR95 are also shown. NCIplot colour range  $-0.002$  a.u.  $\leq (\text{sign}\lambda^2)\rho \leq -0.002$  a.u.

## Cartesian coordinates of PDB models

### 5 (1@SER)

|   |            |            |            |
|---|------------|------------|------------|
| C | -7.6551448 | -0.0994732 | -1.4148618 |
| C | -6.2933048 | -0.6162732 | -0.9513318 |
| O | -5.9999148 | -1.8143932 | -1.0208718 |
| N | -5.4652548 | 0.2948268  | -0.4775018 |
| C | -4.1579448 | -0.0613732 | 0.0349782  |
| C | -3.6877048 | 1.0930368  | 0.9120182  |
| O | -4.5038148 | 1.8673068  | 1.3979382  |
| C | -3.1869648 | -0.3478932 | -1.1276918 |
| O | -1.9543348 | -0.8952632 | -0.6213518 |
| N | -2.3956748 | 1.1912068  | 1.1813982  |
| C | -1.8980648 | 2.2817868  | 2.0004382  |
| C | 1.7550252  | -0.5063132 | -0.6977118 |
| C | 2.4722752  | -0.4561132 | 0.6583482  |
| C | 2.9107152  | 0.9942268  | 0.9659882  |

|    |            |            |            |
|----|------------|------------|------------|
| C  | 3.7245652  | 1.5960568  | -0.1885918 |
| C  | 2.9271752  | 1.4507768  | -1.4966218 |
| C  | 3.7261752  | 1.9881068  | -2.7087918 |
| C  | 1.7526852  | -1.9639732 | 2.4926582  |
| C  | 2.9890252  | -2.7578532 | 2.1712882  |
| C  | 2.9146152  | -3.0312432 | -1.1084118 |
| N  | 1.5568152  | -0.8969632 | 1.7369582  |
| O  | 3.7038552  | 1.0045468  | 2.1799582  |
| O  | 3.9453452  | 2.9765968  | 0.0835982  |
| O  | 2.6735652  | 0.0512468  | -1.6954618 |
| O  | 4.8922452  | 1.2228668  | -2.8629718 |
| O  | 1.0184852  | -2.2695232 | 3.4810182  |
| Se | 1.2886552  | -2.2465932 | -1.1607918 |
| H  | -7.8376560 | 0.9702760  | -1.1918100 |
| H  | -3.6738712 | -1.0455324 | -1.8410801 |
| H  | -2.9291852 | 0.5894244  | -1.6603339 |
| H  | -2.1201712 | -1.8137055 | -0.3350287 |
| H  | -4.2401673 | -0.9917210 | 0.6455225  |
| H  | -2.2757686 | 3.2545564  | 1.6265804  |
| H  | 0.7992547  | 0.0678029  | -0.6708619 |
| H  | 3.3772587  | -1.0759459 | 0.6425667  |
| H  | 2.0016602  | 1.6380493  | 1.0828399  |
| H  | 4.6776580  | 1.0299724  | -0.3164666 |
| H  | 1.9666200  | 2.0154952  | -1.4034447 |
| H  | 4.0170844  | 3.0347921  | -2.4907605 |
| H  | 3.0685784  | 1.9764856  | -3.6124688 |
| H  | 3.0938564  | -3.5207030 | 2.9635972  |
| H  | 3.9074233  | -2.1381834 | 2.1689897  |
| H  | 2.9078581  | -3.2836606 | 1.2088604  |
| H  | 2.8346666  | -4.0586541 | -0.7002715 |
| H  | 3.6562303  | -2.4910065 | -0.4940957 |
| H  | 3.3707910  | -3.1231037 | -2.1165749 |
| H  | 3.1207831  | 0.6714050  | 2.8893783  |
| H  | 4.3762969  | 3.0093462  | 0.9598486  |
| H  | 4.5962920  | 0.2937598  | -2.9305155 |
| H  | -5.7916506 | 1.2171310  | -0.1623778 |
| H  | -1.7712896 | 0.4843241  | 0.7681104  |
| H  | 0.7146073  | -0.3426313 | 1.9189843  |
| H  | -8.4439584 | -0.7154997 | -0.9419733 |
| H  | -7.7358575 | -0.2545210 | -2.5093623 |
| H  | -2.2301029 | 2.1841177  | 3.0555280  |
| H  | -0.7914654 | 2.2853565  | 1.9716155  |

## 5 (1@SER) -Relaxed geometry

|    |            |            |            |
|----|------------|------------|------------|
| C  | -7.7970453 | -0.4649794 | -1.0117067 |
| C  | -6.3501360 | -0.8228472 | -0.6961972 |
| O  | -5.9555299 | -1.9910046 | -0.6478125 |
| N  | -5.5072653 | 0.2384624  | -0.4796183 |
| C  | -4.1527490 | 0.0361591  | -0.0186790 |
| C  | -3.6458633 | 1.3871329  | 0.5427650  |
| O  | -4.4053153 | 2.3502278  | 0.6908044  |
| C  | -3.2374556 | -0.5239720 | -1.1374911 |
| O  | -1.9489576 | -0.8937770 | -0.6265057 |
| N  | -2.3205168 | 1.3967826  | 0.8507918  |
| C  | -1.6329323 | 2.5834096  | 1.3178127  |
| C  | 1.8048620  | -0.4309948 | -0.6875915 |
| C  | 2.4633890  | -0.4107192 | 0.7075366  |
| C  | 2.9281211  | 1.0113502  | 1.0311197  |
| C  | 3.8000985  | 1.5787663  | -0.0840985 |
| C  | 3.0675087  | 1.4759461  | -1.4296959 |
| C  | 3.9664794  | 1.8464223  | -2.6105716 |
| C  | 1.5781119  | -2.0971967 | 2.4307394  |
| C  | 2.8520420  | -2.9226120 | 2.3408985  |
| C  | 3.1099097  | -2.8854148 | -1.5814050 |
| N  | 1.5621924  | -0.8954770 | 1.7318043  |
| O  | 3.6690730  | 1.0734045  | 2.2380451  |
| O  | 4.0970854  | 2.9448742  | 0.1442410  |
| O  | 2.6544780  | 0.1161560  | -1.6704411 |
| O  | 5.0734402  | 0.9696666  | -2.7157591 |
| O  | 0.6062978  | -2.4358072 | 3.0974999  |
| Se | 1.2940324  | -2.2451070 | -1.1659457 |
| H  | -7.9905371 | 0.6230889  | -1.0777024 |
| H  | -3.7522326 | -1.3906318 | -1.6004198 |
| H  | -3.0679185 | 0.2497164  | -1.9132924 |
| H  | -2.0356333 | -1.7571312 | -0.1775560 |
| H  | -4.1481631 | -0.7211966 | 0.8033471  |
| H  | -1.2371761 | 3.2029438  | 0.4822066  |
| H  | 0.8046319  | 0.0692891  | -0.6760158 |
| H  | 3.3630610  | -1.0547733 | 0.6783862  |
| H  | 2.0070374  | 1.6395355  | 1.0776860  |
| H  | 4.7260222  | 0.9579305  | -0.1628483 |
| H  | 2.1776348  | 2.1515314  | -1.4029342 |
| H  | 4.3590343  | 2.8686537  | -2.4401860 |
| H  | 3.3436956  | 1.8578780  | -3.5381084 |
| H  | 2.7983885  | -3.7160537 | 3.1067582  |
| H  | 3.7629110  | -2.3101406 | 2.4969400  |

|   |            |            |            |
|---|------------|------------|------------|
| H | 2.9173426  | -3.3972567 | 1.3407242  |
| H | 3.0115884  | -3.9448824 | -1.8841443 |
| H | 3.7817360  | -2.8195130 | -0.7033032 |
| H | 3.5218969  | -2.2943720 | -2.4192194 |
| H | 3.1049838  | 0.6790926  | 2.9328204  |
| H | 4.4665401  | 2.9919491  | 1.0474951  |
| H | 4.6928230  | 0.0697288  | -2.7426878 |
| H | -5.8536758 | 1.1960457  | -0.3358050 |
| H | -1.7892595 | 0.5694075  | 0.5391548  |
| H | 0.6501756  | -0.4287443 | 1.7929645  |
| H | -8.4459415 | -0.9041401 | -0.2279390 |
| H | -8.0784167 | -0.9455172 | -1.9691766 |
| H | -2.3376784 | 3.2087162  | 1.8983163  |
| H | -0.7860882 | 2.2868427  | 1.9664616  |

## 6 (1@ASP)

|   |            |            |            |
|---|------------|------------|------------|
| C | -3.6993175 | 1.3561952  | 2.4701106  |
| C | -4.0063175 | 1.9561952  | 1.1101106  |
| O | -5.1033175 | 2.4051952  | 0.8551106  |
| N | -3.0143175 | 1.9371952  | 0.2311106  |
| C | -3.2003175 | 2.5011952  | -1.1188894 |
| C | -3.9843175 | 1.5571952  | -2.0258894 |
| O | -4.9963175 | 1.9631952  | -2.6058894 |
| C | -1.8633175 | 2.8841952  | -1.7448894 |
| C | -1.1993175 | 4.0821952  | -1.0488894 |
| O | -1.9083175 | 4.9841952  | -0.5798894 |
| O | 0.0476825  | 4.1261952  | -1.0378894 |
| N | -3.5403175 | 0.3021952  | -2.1258894 |
| C | -4.1313175 | -0.6278048 | -3.0718894 |
| C | 2.3506825  | -0.9048048 | -0.1528894 |
| C | 1.6536825  | -0.9678048 | 1.2201106  |
| C | 2.5506825  | -1.9308048 | 2.0301106  |
| C | 2.4096825  | -3.3228048 | 1.4071106  |
| C | 2.9516825  | -3.2388048 | -0.0208894 |
| C | 2.8596825  | -4.5968048 | -0.7098894 |
| C | 0.5536825  | 1.1991952  | 1.7191106  |
| C | 0.7086825  | 2.3921952  | 2.2341106  |
| C | 3.2156825  | 0.7681952  | -2.5118894 |
| N | 1.6216825  | 0.3981952  | 1.7621106  |
| O | 2.2956825  | -2.0548048 | 3.4181106  |
| O | 3.1016825  | -4.3218048 | 2.1851106  |
| O | 2.2476825  | -2.2158048 | -0.7518894 |
| O | 3.1086825  | -4.4808048 | -2.1128894 |
| O | -0.5183175 | 0.9131952  | 1.2191106  |

|    |            |            |            |
|----|------------|------------|------------|
| Se | 1.6496825  | 0.5711952  | -1.3088894 |
| H  | -3.8633697 | 2.1314957  | 3.2459710  |
| H  | -2.6706100 | 0.9533663  | 2.5633871  |
| H  | -1.1594623 | 2.0219705  | -1.7688016 |
| H  | -2.0517117 | 3.1709139  | -2.8027339 |
| H  | -3.8074240 | 3.4220864  | -1.0271543 |
| H  | -5.0105501 | -0.1112066 | -3.5038110 |
| H  | 3.4310739  | -0.6569575 | -0.0060943 |
| H  | 0.6068023  | -1.3137758 | 1.1138584  |
| H  | 3.6107957  | -1.5850467 | 1.8815592  |
| H  | 1.3438207  | -3.6270944 | 1.4055691  |
| H  | 4.0354245  | -2.9472036 | 0.0324658  |
| H  | 3.6117906  | -5.2787038 | -0.2658332 |
| H  | 1.8516070  | -5.0407926 | -0.5074759 |
| H  | 1.6398877  | 2.5948832  | 2.8041370  |
| H  | 0.6681007  | 3.1337529  | 1.3881365  |
| H  | 4.1374592  | 0.9613430  | -1.9278510 |
| H  | 2.9813684  | 1.6586021  | -3.1261229 |
| H  | 3.3463207  | -0.1181431 | -3.1610796 |
| H  | 2.5391962  | -2.9839904 | 3.6194920  |
| H  | 4.0585191  | -4.1322385 | 2.1025960  |
| H  | 2.6335099  | -3.6656163 | -2.3775221 |
| H  | -3.4272307 | -0.8960301 | -3.8920172 |
| H  | -4.4665814 | -1.5675457 | -2.5796455 |
| H  | -4.4310497 | 0.5464628  | 2.6671492  |
| H  | -2.0615313 | 1.6810375  | 0.5303739  |
| H  | -2.6961958 | 0.0466394  | -1.6098801 |
| H  | 2.4680056  | 0.7395644  | 2.2144510  |
| H  | -0.1537145 | 2.6808011  | 2.8667861  |

**7 (2@ASP)**

|   |            |            |            |
|---|------------|------------|------------|
| C | -5.4400517 | -1.4886800 | 1.5574788  |
| C | -4.2769317 | -0.5517100 | 1.2524388  |
| O | -3.9347417 | 0.3150300  | 2.0580388  |
| N | -3.6765417 | -0.7320800 | 0.0805488  |
| C | -2.5502817 | 0.0889600  | -0.3424912 |
| C | -2.9536517 | 1.5540700  | -0.4741312 |
| O | -2.2432717 | 2.4463200  | -0.0144512 |
| C | -1.9831317 | -0.4169800 | -1.6700912 |
| C | -1.4768417 | -1.8437900 | -1.5845112 |
| O | -2.2223617 | -2.7208300 | -1.0951812 |
| O | -0.3276817 | -2.0909000 | -2.0049912 |
| N | -4.0962717 | 1.7947600  | -1.1093912 |
| C | -4.5933017 | 3.1516200  | -1.3008412 |

|    |            |            |            |
|----|------------|------------|------------|
| Se | 0.8165283  | -1.6775900 | 1.3430888  |
| C  | 2.6717383  | -1.2454600 | 0.8424588  |
| C  | 2.6834683  | -1.4850500 | -0.6658412 |
| O  | 2.8320983  | -2.8802000 | -0.8758112 |
| C  | 3.9170683  | -0.7920500 | -1.2672612 |
| O  | 3.8757483  | -0.8628200 | -2.6776712 |
| C  | 3.8523683  | 0.6818600  | -0.8376012 |
| O  | 4.8653783  | 1.4279700  | -1.4806012 |
| C  | 4.0514583  | 0.7040100  | 0.6843288  |
| O  | 2.9073783  | 0.0727500  | 1.2882988  |
| C  | 4.1279783  | 2.1276300  | 1.2281088  |
| O  | 5.3733983  | 2.2744200  | 1.8855988  |
| C  | 0.7431983  | -0.8891500 | 3.1306888  |
| H  | -6.3620617 | -0.8812109 | 1.6539502  |
| H  | -2.7644155 | -0.3548460 | -2.4614996 |
| H  | -1.1299143 | 0.2080815  | -1.9799950 |
| H  | -1.7528713 | 0.0751577  | 0.4317842  |
| H  | -3.7553868 | 3.8423466  | -1.0944617 |
| H  | 3.3786306  | -1.9655669 | 1.3185775  |
| H  | 1.7766278  | -1.0777001 | -1.1619508 |
| H  | 2.0898364  | -3.1532545 | -1.4460433 |
| H  | 4.8375370  | -1.2699656 | -0.8477891 |
| H  | 4.4882142  | -0.1595236 | -2.9749872 |
| H  | 2.8350705  | 1.0753708  | -1.0713415 |
| H  | 4.5805498  | 2.3565155  | -1.5277346 |
| H  | 4.9992202  | 0.1804184  | 0.9507267  |
| H  | 4.0032383  | 2.8746196  | 0.4028742  |
| H  | 3.2570106  | 2.2669401  | 1.9128531  |
| H  | 5.4005009  | 3.1604928  | 2.2899265  |
| H  | 1.2160388  | 0.1092653  | 3.0917581  |
| H  | -0.3299769 | -0.7796480 | 3.3786670  |
| H  | -3.8967604 | -1.5697379 | -0.4591662 |
| H  | -4.7120600 | 1.0068122  | -1.3204136 |
| H  | 1.2437553  | -1.5258674 | 3.8853608  |
| H  | -5.6133373 | -2.2825270 | 0.8029350  |
| H  | -5.2616137 | -1.9579716 | 2.5442627  |
| H  | -4.9519186 | 3.2965093  | -2.3401950 |
| H  | -5.4209098 | 3.3898002  | -0.5985002 |
| H  | -1.7206483 | -3.5700934 | -1.0724749 |

**8 (3@TYR)**

|   |           |            |           |
|---|-----------|------------|-----------|
| C | 5.4322761 | -0.8276306 | 2.0810306 |
| C | 4.2922761 | -1.7116306 | 1.5380306 |
| O | 3.4132761 | -2.1326306 | 2.2860306 |

|    |            |            |            |
|----|------------|------------|------------|
| N  | 4.3372761  | -1.9846306 | 0.2380306  |
| C  | 3.3392761  | -2.8476306 | -0.3729694 |
| C  | 3.9852761  | -3.8516306 | -1.3029694 |
| O  | 5.0292761  | -3.5896306 | -1.9169694 |
| C  | 2.3262761  | -2.0426306 | -1.1809694 |
| C  | 1.4932761  | -1.1686306 | -0.3059694 |
| C  | 0.3232761  | -1.7026306 | 0.2440306  |
| C  | 1.8232761  | 0.1683694  | -0.0369694 |
| C  | -0.4947239 | -0.9426306 | 1.0380306  |
| C  | 0.9882761  | 0.9003694  | 0.8300306  |
| C  | -0.1517239 | 0.3393694  | 1.3150306  |
| O  | -1.0517239 | 1.0833694  | 2.1480306  |
| N  | 3.3912761  | -5.0436306 | -1.3989694 |
| C  | 3.7612761  | -6.0426306 | -2.4159694 |
| O  | -1.7627239 | 3.6623694  | 1.4770306  |
| C  | -2.6257239 | 4.0843694  | 0.4280306  |
| C  | -1.9937239 | 3.6673694  | -0.9029694 |
| O  | -0.6687239 | 4.2033694  | -1.0079694 |
| C  | -2.1707239 | 2.1673694  | -1.1399694 |
| C  | -4.0167239 | 3.4663694  | 0.5660306  |
| C  | -4.6197239 | 3.8033694  | 1.9060306  |
| O  | -3.9847239 | 2.0383694  | 0.3850306  |
| C  | -3.6237239 | 1.7663694  | -0.9639694 |
| Se | -3.6727239 | -0.2106306 | -1.0479694 |
| C  | -5.5927239 | -0.1246306 | -1.1389694 |
| H  | 6.1713153  | -0.5128622 | 1.3174446  |
| H  | 1.6775022  | -2.7474721 | -1.7441364 |
| H  | 2.8832223  | -1.4553730 | -1.9418264 |
| H  | 0.0481693  | -2.7452396 | 0.0146215  |
| H  | 2.7329389  | 0.6175818  | -0.4619707 |
| H  | -1.4409053 | -1.3304798 | 1.4407820  |
| H  | 1.2367034  | 1.9408826  | 1.0924986  |
| H  | -1.1371557 | 2.0057953  | 1.8089680  |
| H  | 2.8145267  | -3.3483736 | 0.4687796  |
| H  | 4.7323906  | -5.7308868 | -2.8418977 |
| H  | -2.0592941 | 4.0466509  | 2.3213176  |
| H  | -2.7121660 | 5.1961439  | 0.4378513  |
| H  | -2.5743449 | 4.1991666  | -1.6910204 |
| H  | -0.1971966 | 3.8907288  | -0.2096701 |
| H  | -1.5752720 | 1.6009633  | -0.3961375 |
| H  | -4.6517313 | 3.9231629  | -0.2377231 |
| H  | -4.6415794 | 4.9004161  | 2.0630843  |
| H  | -4.0380949 | 3.3260911  | 2.7219835  |
| H  | -5.6554911 | 3.4200704  | 1.9860686  |

|   |            |            |            |
|---|------------|------------|------------|
| H | -4.3304652 | 2.2158496  | -1.7004551 |
| H | -5.9578433 | 0.4972984  | -0.2989495 |
| H | -6.0193287 | -1.1417542 | -1.0359162 |
| H | -5.9307210 | 0.3000451  | -2.1049047 |
| H | 4.9777248  | 0.0712540  | 2.5412321  |
| H | 5.9490778  | -1.3839273 | 2.8868065  |
| H | 3.8649732  | -7.0451984 | -1.9555036 |
| H | 3.0059522  | -6.0929423 | -3.2287903 |
| H | 2.5376344  | -5.2085145 | -0.8621440 |
| H | 5.1437277  | -1.7587508 | -0.3510008 |
| H | -1.7881341 | 1.9078831  | -2.1476152 |

**9 (4@TYR)**

|   |            |            |            |
|---|------------|------------|------------|
| C | 24.4470000 | 30.4900000 | 3.2470000  |
| C | 22.9640000 | 30.8080000 | 3.1310000  |
| O | 22.5780000 | 31.9550000 | 2.9060000  |
| H | 24.5370000 | 29.5380000 | 3.4120000  |
| N | 22.1400000 | 29.7750000 | 3.2650000  |
| C | 20.6950000 | 29.9490000 | 3.3270000  |
| C | 20.3270000 | 30.7400000 | 4.5760000  |
| O | 20.9770000 | 30.6110000 | 5.6110000  |
| C | 19.9890000 | 28.5950000 | 3.3370000  |
| C | 20.1600000 | 27.7850000 | 2.0740000  |
| C | 21.2470000 | 26.9430000 | 1.9110000  |
| C | 19.2190000 | 27.8470000 | 1.0520000  |
| C | 21.4010000 | 26.1900000 | 0.7640000  |
| C | 19.3650000 | 27.1000000 | -0.0960000 |
| C | 20.4580000 | 26.2730000 | -0.2360000 |
| O | 20.6020000 | 25.5240000 | -1.3810000 |
| H | 22.5022894 | 28.9202546 | 3.6895384  |
| H | 20.3945982 | 30.5199500 | 2.4203333  |
| H | 20.3469019 | 28.0270971 | 4.2244388  |
| H | 18.9109932 | 28.7853771 | 3.5184072  |
| H | 21.9913123 | 26.8432262 | 2.7173458  |
| H | 18.3370366 | 28.4987621 | 1.1635582  |
| H | 22.2638799 | 25.5129899 | 0.6542221  |
| H | 18.6230516 | 27.1408199 | -0.9073506 |
| H | 21.3672761 | 24.9319736 | -1.2640761 |
| N | 19.2840000 | 31.5560000 | 4.4830000  |
| C | 18.8700000 | 32.3690000 | 5.6180000  |
| H | 18.8974674 | 31.7693822 | 3.5624445  |



|    |            |            |           |
|----|------------|------------|-----------|
| H  | 19.4607257 | 33.3082128 | 5.6889640 |
| C  | 18.8660000 | 21.1280000 | 2.4100000 |
| C  | 18.4000000 | 21.4640000 | 3.8270000 |
| O  | 17.1210000 | 22.1140000 | 3.7980000 |
| C  | 18.2460000 | 20.1860000 | 4.6430000 |
| O  | 17.9470000 | 20.5190000 | 6.0020000 |
| C  | 19.5030000 | 19.3330000 | 4.5840000 |
| O  | 20.5570000 | 20.0500000 | 5.2320000 |
| C  | 19.8400000 | 19.0690000 | 3.1250000 |
| C  | 21.0490000 | 18.1510000 | 2.9690000 |
| O  | 20.0540000 | 20.3270000 | 2.4880000 |
| Se | 19.3450000 | 22.6860000 | 1.3370000 |
| C  | 17.7370000 | 23.7760000 | 1.0920000 |
| H  | 18.0522034 | 20.5606169 | 1.8954279 |
| H  | 19.1773244 | 22.1138842 | 4.2995333 |
| H  | 16.8322765 | 22.1110997 | 4.7343089 |
| H  | 17.3714108 | 19.6263554 | 4.2451117 |
| H  | 18.8227364 | 20.7538119 | 6.3804348 |
| H  | 19.3516392 | 18.3878227 | 5.1463911 |
| H  | 20.8969911 | 20.6762067 | 4.5572408 |
| H  | 18.9548048 | 18.5733292 | 2.6505752 |
| H  | 20.8034312 | 17.1521649 | 3.3784490 |
| H  | 21.3277113 | 18.0437875 | 1.9030740 |
| H  | 21.9163041 | 18.5530630 | 3.5280758 |
| H  | 17.2416668 | 23.9548664 | 2.0632931 |
| H  | 17.0314915 | 23.3131982 | 0.3759681 |
| H  | 18.1352788 | 24.7226709 | 0.6779573 |
| H  | 24.9538371 | 30.7869842 | 2.3102250 |
| H  | 17.7959754 | 32.6237313 | 5.5313853 |
| H  | 19.0436064 | 31.7941238 | 6.5466265 |
| H  | 24.8762402 | 31.0856417 | 4.0740036 |

**10 (4@MET)**

|   |           |            |            |
|---|-----------|------------|------------|
| C | 1.2969620 | 0.3559035  | 5.9555643  |
| C | 1.7909620 | -0.5380965 | 4.8325643  |
| O | 1.4909620 | -1.7320965 | 4.8145643  |
| H | 1.7616552 | 1.3622642  | 5.9815471  |
| N | 2.5339620 | 0.0279035  | 3.8885643  |
| C | 2.8919620 | -0.7280965 | 2.6965643  |
| C | 4.3329620 | -0.5410965 | 2.2685643  |
| O | 4.9589620 | 0.4829035  | 2.5435643  |
| C | 1.9629620 | -0.3460965 | 1.5455643  |
| C | 2.0059620 | 1.1159035  | 1.1715643  |
| S | 0.8109620 | 1.4649035  | -0.1344357 |

|    |            |            |            |
|----|------------|------------|------------|
| C  | 1.2249620  | 3.1609035  | -0.5214357 |
| H  | 2.9407277  | 0.9607798  | 3.9851943  |
| H  | 2.6967617  | -1.7888626 | 2.9618522  |
| H  | 2.2039120  | -0.9645860 | 0.6525905  |
| H  | 0.9288759  | -0.6301089 | 1.8400583  |
| H  | 1.7752359  | 1.7458287  | 2.0591102  |
| H  | 3.0240959  | 1.4063824  | 0.8299947  |
| H  | 0.5518449  | 3.4668117  | -1.3471589 |
| H  | 1.0639386  | 3.8440498  | 0.3395596  |
| H  | 2.2746483  | 3.2631962  | -0.8698759 |
| N  | 4.8419620  | -1.5690965 | 1.6015643  |
| C  | 6.1619620  | -1.5460965 | 0.9945643  |
| H  | 4.2578905  | -2.3935889 | 1.4526542  |
| H  | 6.6347769  | -0.5840378 | 1.2675545  |
| C  | -2.5230380 | 0.4659035  | -2.9424357 |
| C  | -3.0510380 | 0.8839035  | -1.5704357 |
| O  | -3.3940380 | 2.2799035  | -1.5554357 |
| C  | -4.2970380 | 0.0819035  | -1.1984357 |
| O  | -4.6320380 | 0.3349035  | 0.1705643  |
| C  | -4.0790380 | -1.4120965 | -1.3784357 |
| O  | -3.1550380 | -1.8740965 | -0.3824357 |
| C  | -3.5340380 | -1.6700965 | -2.7764357 |
| C  | -3.2970380 | -3.1530965 | -3.0384357 |
| O  | -2.3160380 | -0.9480965 | -2.9314357 |
| Se | -0.8470380 | 1.3719035  | -3.3724357 |
| C  | -1.3780380 | 2.1379035  | -5.0824357 |
| H  | -3.2599960 | 0.7677920  | -3.7278548 |
| H  | -2.2665257 | 0.6401774  | -0.8147232 |
| H  | -2.5482372 | 2.7491379  | -1.7198749 |
| H  | -5.1252655 | 0.4136331  | -1.8753430 |
| H  | -4.4946864 | 1.2945215  | 0.3005206  |
| H  | -5.0689333 | -1.9260763 | -1.2733315 |
| H  | -3.4097770 | -1.3721711 | 0.4206155  |
| H  | -4.2946012 | -1.2844490 | -3.5054874 |
| H  | -2.5995574 | -3.5550220 | -2.2786039 |
| H  | -4.2537061 | -3.7061412 | -2.9707530 |
| H  | -2.8612723 | -3.3046328 | -4.0448806 |
| H  | -2.2520450 | 2.8062150  | -4.9631068 |
| H  | -1.6029575 | 1.3396922  | -5.8156263 |
| H  | -0.5183415 | 2.7307702  | -5.4504739 |
| H  | 0.2007305  | 0.4773228  | 5.8427095  |
| H  | 1.4699383  | -0.1578392 | 6.9199945  |
| H  | 6.1035166  | -1.6204236 | -0.1119458 |
| H  | 6.7934678  | -2.3760367 | 1.3739569  |

**11 (4@TYR)**

|    |            |            |            |
|----|------------|------------|------------|
| C  | 2.5787493  | -5.7163520 | 3.7477997  |
| C  | 3.2567493  | -4.3683520 | 3.9637997  |
| O  | 4.4537493  | -4.2993520 | 4.2417997  |
| H  | 1.4819265  | -5.6607552 | 3.6004893  |
| N  | 2.4767493  | -3.2983520 | 3.8377997  |
| C  | 3.0007493  | -1.9413520 | 3.9557997  |
| C  | 1.8757493  | -0.9773520 | 4.3127997  |
| O  | 0.7127493  | -1.3713520 | 4.3597997  |
| C  | 3.6767493  | -1.5123520 | 2.6497997  |
| C  | 2.7317493  | -1.4493520 | 1.4717997  |
| C  | 2.3887493  | -2.5973520 | 0.7677997  |
| C  | 2.1897493  | -0.2403520 | 1.0567997  |
| C  | 1.5227493  | -2.5413520 | -0.3082003 |
| C  | 1.3277493  | -0.1753520 | -0.0102003 |
| C  | 0.9987493  | -1.3243520 | -0.6942003 |
| O  | 0.1337493  | -1.2463520 | -1.7612003 |
| H  | 1.4614968  | -3.3515354 | 3.7058211  |
| H  | 3.7723335  | -1.9510252 | 4.7590039  |
| H  | 4.1767492  | -0.5294567 | 2.7883806  |
| H  | 4.4922247  | -2.2421825 | 2.4642268  |
| H  | 2.8227133  | -3.5640163 | 1.0667962  |
| H  | 2.4525648  | 0.6841338  | 1.5959576  |
| H  | 1.2597215  | -3.4581017 | -0.8614902 |
| H  | 0.9018492  | 0.7819546  | -0.3503941 |
| H  | 0.0352138  | -2.1288330 | -2.1612552 |
| N  | 2.2227493  | 0.2826480  | 4.5637997  |
| C  | 1.2227493  | 1.3056480  | 4.8557997  |
| H  | 3.2064936  | 0.5513352  | 4.5280505  |
| H  | 0.2325239  | 0.8173816  | 4.8103392  |
| C  | -1.6992507 | 2.1736480  | -3.4322003 |
| C  | -1.9602507 | 2.6146480  | -1.9942003 |
| O  | -0.8642507 | 3.4396480  | -1.5802003 |
| C  | -3.2972507 | 3.3506480  | -1.9972003 |
| O  | -3.6562507 | 3.7846480  | -0.6832003 |
| C  | -4.3812507 | 2.4396480  | -2.5602003 |
| O  | -4.6022507 | 1.3756480  | -1.6332003 |
| C  | -3.9582507 | 1.8816480  | -3.9212003 |
| C  | -4.9532507 | 0.8966480  | -4.5232003 |
| O  | -2.7032507 | 1.2286480  | -3.7862003 |
| Se | 0.0657493  | 1.3936480  | -3.6402003 |
| C  | 0.4127493  | 2.2766480  | -5.3472003 |
| H  | -1.7288680 | 3.0665593  | -4.1029422 |

|   |            |            |            |
|---|------------|------------|------------|
| H | -2.0515318 | 1.6968765  | -1.3674479 |
| H | -1.1604596 | 3.8658357  | -0.7509248 |
| H | -3.1680319 | 4.2386166  | -2.6649725 |
| H | -4.3458122 | 4.4668565  | -0.7784320 |
| H | -5.3166102 | 3.0463090  | -2.7089948 |
| H | -4.5545176 | 1.8058905  | -0.7538570 |
| H | -3.8523800 | 2.7628483  | -4.6088686 |
| H | -5.0979829 | 0.0478625  | -3.8278486 |
| H | -4.5663682 | 0.5129443  | -5.4863167 |
| H | -5.9321482 | 1.3864549  | -4.6945099 |
| H | 0.4723583  | 3.3759466  | -5.2232370 |
| H | 1.3879345  | 1.9081878  | -5.7212918 |
| H | -0.3708325 | 2.0150413  | -6.0845484 |
| H | 1.3691184  | 1.7360846  | 5.8685191  |
| H | 1.2591283  | 2.1268652  | 4.1096166  |
| H | 2.8016421  | -6.3657032 | 4.6162077  |
| H | 3.0351162  | -6.1969859 | 2.8592219  |
